# Supplementary material
Source: ML conference proceedings conference paper supplement (https://openaccess.thecvf.com/content/CVPR2024/html/Pang_HIR-Diff_Unsupervised_Hyperspectral_CVPR_2024_paper.html)
Supplement: Supplementary file 1 [file Pang_HIR-Diff_Unsupervised_Hyperspectral_CVPR_2024_supplemental.pdf]

# HIR-Diff: Unsupervised Hyperspectral Image Restoration Via Improved Diffusion Models

## Supplementary Material

### 1. Band Index Selection Using RRQR

#### 1.1. Notation

The QR factorization of matrix  $\mathbf{X} \in \mathbb{R}^{m \times n}$  is defined as

$$\mathbf{X} = \mathbf{QR} \equiv \mathbf{Q} \begin{bmatrix} \mathbf{R}_{11} & \mathbf{R}_{12} \\ \mathbf{0} & \mathbf{R}_{22} \end{bmatrix}, \quad (25)$$

where  $\mathbf{Q} \in \mathbb{R}^{m \times m}$  is an orthogonal matrix and  $\mathbf{R} \in \mathbb{R}^{m \times n}$  is an upper triangular matrix. Then  $\mathcal{R}_k(\mathbf{X})$  is defined as

$$\mathcal{R}_k(\mathbf{X}) = \begin{bmatrix} \mathbf{R}_{11} & \mathbf{R}_{12} \\ \mathbf{0} & \mathbf{R}_{22} \end{bmatrix}. \quad (26)$$

For  $\mathbf{R}_{11}$ ,  $1/\omega_i(\mathbf{R}_{11})$  denotes the 2-norm of the  $i$ th row of  $\mathbf{R}_{11}^{-1}$ . For  $\mathbf{R}_{22}$ ,  $1/\gamma_j(\mathbf{R}_{22})$  denotes the 2-norm of the  $j$ th column of  $\mathbf{R}_{22}$ . Then  $\rho(\mathbf{R}, k)$  is defined as

$$\rho(\mathbf{R}, k) = \max_{\substack{1 \leq i \leq k \\ 1 \leq j \leq n-k}} \sqrt{(\mathbf{R}_{11}^{-1} \mathbf{R}_{12})_{i,j}^2 + (\gamma_j(\mathbf{R}_{22})/\omega_i(\mathbf{R}_{11}))^2}. \quad (27)$$

$\Pi_{i,j}$  denotes the permutation that interchanges the  $i$ th and  $j$ th columns of a matrix.

#### 1.2. RRQR

In this section, we provide a more detailed description of the RRQR algorithm process [12] employed in our work. As introduced in Sect. 3.3, the RRQR is used to determine the band index  $(i_1, i_2, \dots, i_K)$  so that  $|\det(\mathbf{V}_s)|$  is prevented from being zero and each band in the reduced image  $\mathcal{A}$  is able to encode different image information. Given a matrix  $\mathbf{M} \in \mathbb{R}^{m \times n}$  with  $m \geq n$ , the QR factorization of  $\mathbf{M}$  with its columns permuted can be formulated as

$$\mathbf{M}\Pi = \mathbf{QR} \equiv \mathbf{Q} \begin{bmatrix} \mathbf{R}_{11} & \mathbf{R}_{12} \\ \mathbf{0} & \mathbf{R}_{22} \end{bmatrix}, \quad (28)$$

where  $\mathbf{Q} \in \mathbb{R}^{m \times m}$  is an orthogonal matrix,  $\mathbf{R} \in \mathbb{R}^{m \times n}$  is an upper triangular matrix and  $\Pi$  is a permutation matrix.

The RRQR aims to choose  $\Pi$  such that  $\sigma_{\min}(\mathbf{R}_{11})$  is sufficiently large and  $\sigma_{\max}(\mathbf{R}_{22})$  is sufficiently small, where  $\sigma(\cdot)$  denotes the singular values. The RRQR factorization algorithm works by interchanging any pair of columns that sufficiently increases  $|\det(\mathbf{R}_{11})|$ , resulting in a large  $|\det(\mathbf{R}_{11})|$ . The details of the RRQR process are illustrated in Algorithm 2, where  $k$  and  $f \geq 1$  are hyperparameters. It can be proven that  $|\det(\mathbf{R}_{11})|$  increases strictly with every interchange and the algorithm is completed within a finite number of permutations. Readers

---

#### Algorithm 2: RRQR Algorithm

---

**Input:**  $\mathbf{M}, k, f$

**Output:** Permutation matrix  $\Pi$

Compute  $\mathbf{R} := \mathcal{R}_k(\mathbf{M})$  and  $\Pi = \mathbf{I}$

**while True do**

**step 1:** Compute  $\rho(\mathbf{R}, k)$

**step 2:** **if**  $\rho(\mathbf{R}, k) \leq f$  **then Break;**

**step 3:** Find  $i$  and  $j$  such that  $\rho(\mathbf{R}, k) > f$

**step 4:** Compute  $\mathbf{R} := \mathcal{R}_k(\mathbf{R}\Pi_{i,j+k})$  and

$\Pi := \Pi\Pi_{i,j+k}$

**end**

**return**  $\Pi$

---

could refer to [12] for more detailed proof. We replace  $\mathbf{M}$  in Eq.(28) with  $\mathbf{V}^T$  and we have

$$\mathbf{V}^T \Pi_v = [\mathbf{Q}_v \mathbf{R}_{v1} \quad \mathbf{Q}_v \mathbf{R}_{v2}] \quad (29)$$

We define  $\mathbf{V}_s^T$  as  $\mathbf{Q}_v \mathbf{R}_{v1}$  and then we could readily obtain  $|\det(\mathbf{V}_s)| = |\det(\mathbf{R}_{v1})|$ . Therefore, by solving the RRQR factorization problem of  $\mathbf{V}^T$  utilizing the algorithm proposed in [12], the permutation matrix  $\Pi_v$  is obtained and  $|\det(\mathbf{V}_s)|$  is maximized. The indices corresponding to the first  $K$  columns of the permuted  $\mathbf{V}^T$  are defined as the band selection index.

### 2. Diffusion Model

In HIR-Diff, we employ a pre-trained diffusion model proposed in [10] to generate the reduced image  $\mathcal{A}$ . The diffusion model is a U-Net proposed in [40] and is trained on an amount of 3-channel remote sensing images without human supervision. Since the network requires the input image to be 3-channel, the rank value  $K$  in our work is set as 3 so that the reduced image  $\mathcal{A}$  with 3 channels can be denoised with the pre-trained network. Although the rank value is small, we found that it is sufficient to restore the image details and helps to keep noise out of the estimated coefficient matrix  $\mathbf{E}$  and the restored image, since the matrix  $\mathbf{V}$  obtained from the SVD of the observed image as introduced in Sec. 3.3 is cleaner and the low-rank property enables noise reduction of the restored image.

### 3. Coefficient Matrix Estimation

In our work, we employ SVD and RRQR to estimate the coefficient matrix  $\mathbf{E}$  as introduced in Sec. 3.3. The visualization results of the estimated  $\mathbf{E}$  for the WDC dataset

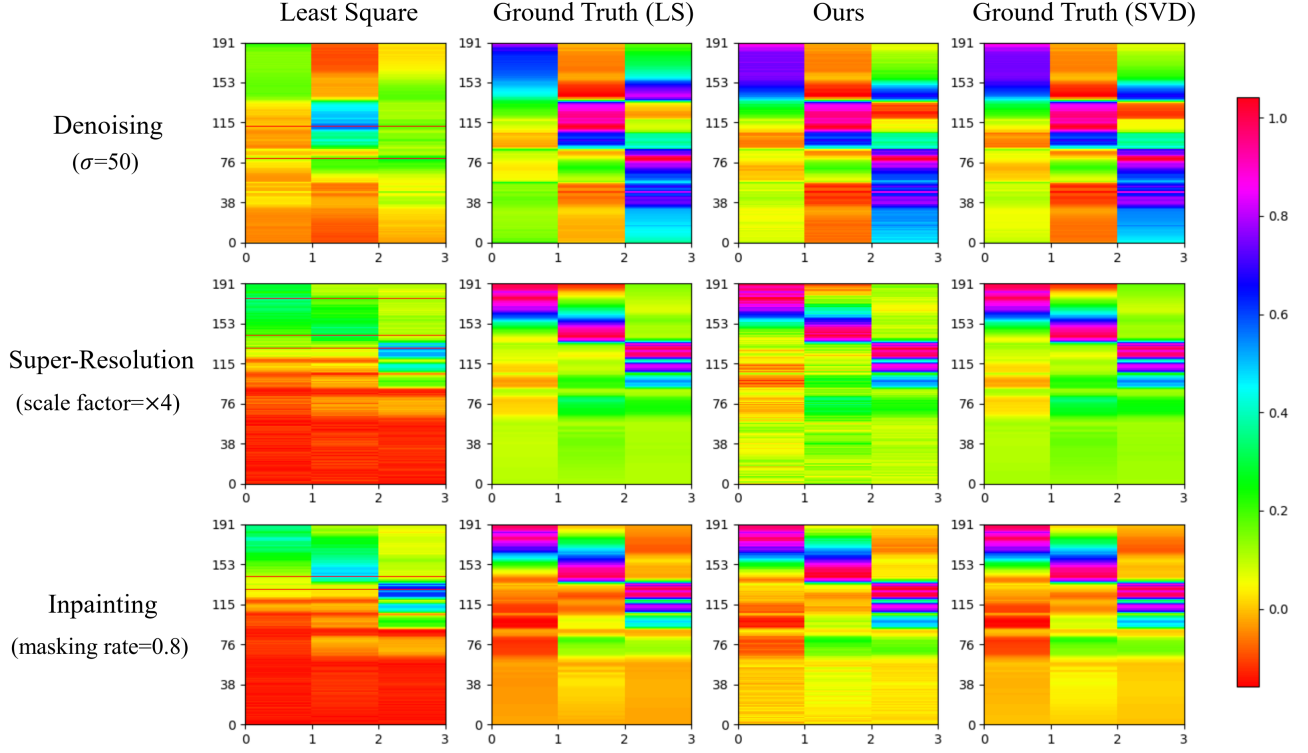

Figure 5. The visualization results of the estimated  $\mathbf{E}$ . **Least Square** and **Ground Truth (LS)** denote the coefficient matrix  $\mathbf{E}$  estimated by employing the least square method with the observed image and the clean image, respectively. **Ours** and **Ground Truth (SVD)** denote the coefficient matrix  $\mathbf{E}$  estimated using SVD and RRQR proposed in our work with the observed image and the clean image, respectively.

are demonstrated in Fig. 5. The results of the matrix  $\mathbf{E}$  estimated using the least square method proposed in [38] is also provided for comparison. Specifically, the least-squares method directly selects several bands from the observed image  $\mathcal{Y}$  as the reduced image  $\mathcal{A}$ , and then estimates the coefficient matrix  $E$  by solving the least-squares problem.

$$\arg \min_{\mathbf{E}} \|\mathcal{Y} - \mathcal{A} \times_3 E\|_F^2. \quad (30)$$

Since there is a lot of noise in the reduced image  $\mathcal{A}$  as the observed image suffers from various degradation, the estimated  $\mathbf{E}$  is unreliable, resulting in undesirable HSI restoration performance. On the contrary, our estimated coefficient matrix  $\mathbf{E}$  is robust to noise and exhibits a high degree of similarity to ground truth, verifying the effectiveness of our estimation method.
